# Supplementary material for: Human T cell receptor occurrence patterns encode immune history, genetic background, and receptor specificity
Source: eLife journal article supplement (doi:10.7554/elife.38358), 2018-08-28
Supplement: supp [file elife_poa_e38358_Figure_3_figure_supplement_3.pdf › elife_poa_e38358_Figure_3_figure_supplement_3.pdf]

A

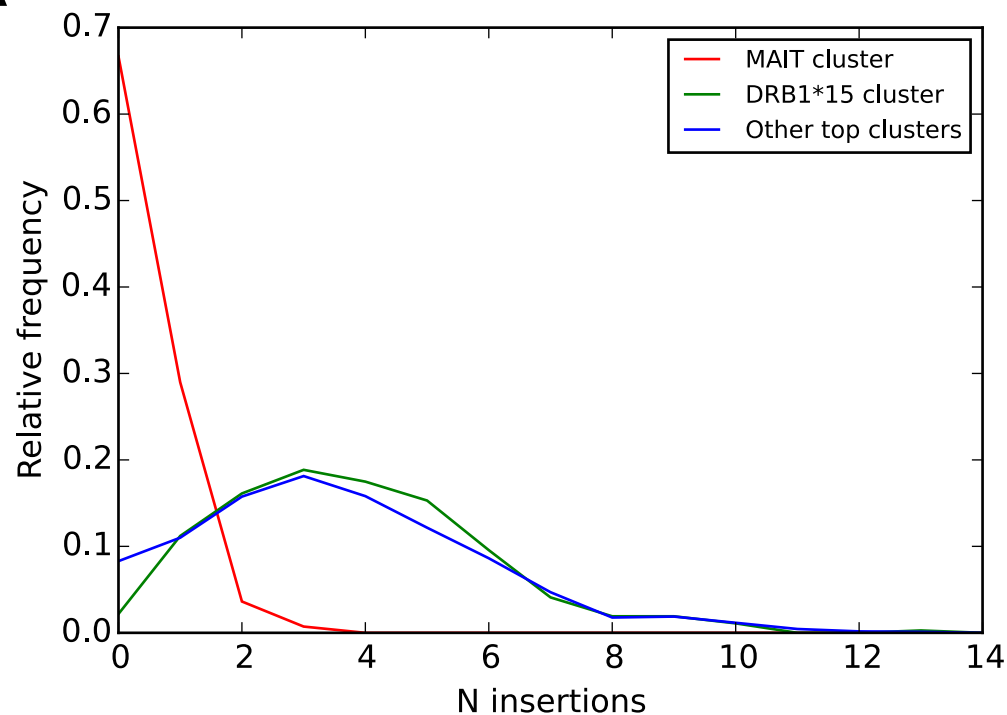

B

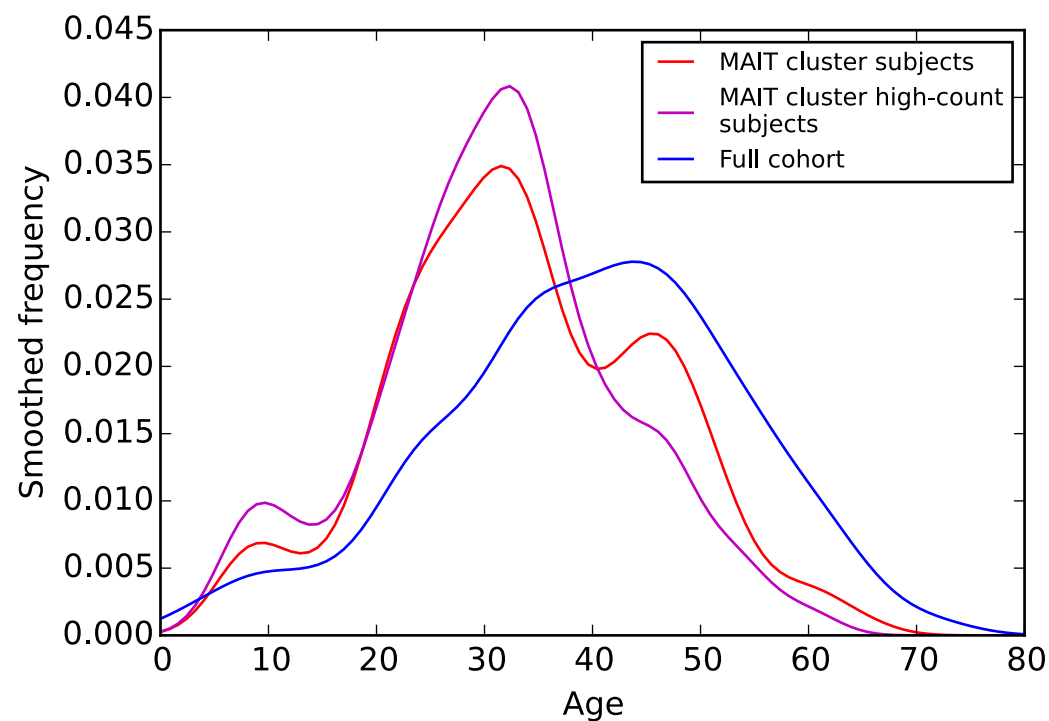

C

| V-alpha       | J-alpha   | CDR3-alpha         | TCR-beta            |
|---------------|-----------|--------------------|---------------------|
| TRAV1-1*01    | TRAJ3*01  | CAVRERRSSASKIIF    | V06,CASSDSAGGPDTQYF |
| TRAV1-2*01    | TRAJ11*01 | CAVPFYSGYSTLTF     | V06,CASSERDTGELFF   |
| TRAV1-2*01    | TRAJ12*01 | CAALDSSYKLIF       | V06,CASSDSGGANEQFF  |
| TRAV1-2*01    | TRAJ16*01 | CAKDGGQKLLF        | V06,CASSDSSTDTQYF   |
| TRAV1-2*01    | TRAJ20*01 | CAALGNDYKLSF       | V06,CASSDSGGSYNEQFF |
| TRAV1-2*01    | TRAJ20*01 | CAGLSNDYKLSF       | V06,CASSDSAGGPDTQYF |
| TRAV1-2*01    | TRAJ20*01 | CAVIRNDYKLSF       | V06,CASSDSAGGPDTQYF |
| TRAV1-2*01    | TRAJ20*01 | CAVKSGDYKLSF       | V06,CASSELAGGPDTQYF |
| TRAV1-2*01    | TRAJ20*01 | CAVNGDDYKLSF       | V06,CASSDSSGGADTQYF |
| TRAV1-2*01    | TRAJ20*01 | CAVRDGDYKLSF       | V06,CASSERGGTDTQYF  |
| TRAV1-2*01    | TRAJ33*01 | CAVGESNYQLIW       | V06,CASSDSGGSYNEQFF |
| TRAV1-2*01    | TRAJ33*01 | CAVRDRNYQLIW       | V06,CASSDSSTGELFF   |
| TRAV1-2*01    | TRAJ33*01 | CAVRDSNYQLIW       | V06,CASSDSAGGTDTQYF |
| TRAV1-2*01    | TRAJ33*01 | CTPLDSNYQLIW       | V04,CASSQDRGGQETQYF |
| TRAV1-2*01    | TRAJ4*01  | CAAPRSPGGYNKLIF    | V06,CASSDSSTDTQYF   |
| TRAV10*01     | TRAJ27*01 | CVVSVGTNAGKSTF     | V06,CASSERDTGELFF   |
| TRAV10*01     | TRAJ6*01  | CVVGQRGGSYIPTF     | V04,CASSQDRGGADTQYF |
| TRAV12-1*01   | TRAJ5*01  | CVEDTGRRALTF       | V06,CASSERGGTDTQYF  |
| TRAV13-1*01   | TRAJ5*01  | CAANRTGRRALTF      | V06,CASSEDSSGANVLTf |
| TRAV13-1*01   | TRAJ7*01  | CAAVFYGNNRLAF      | V06,CASSDSAGGTDTQYF |
| TRAV13-2*01   | TRAJ34*01 | CAYNTDKLIF         | V06,CASSDSTSGSNEQFF |
| TRAV14/DV4*02 | TRAJ3*01  | CAMREGLTLGSSASKIIF | V04,CASSQDRGGQETQYF |
| TRAV14/DV4*02 | TRAJ6*01  | CAMSKGEGGSYIPTF    | V06,CASSDSGGGTDTQYF |
| TRAV19*01     | TRAJ8*01  | CALSEALGFQKLVF     | V06,CASSDSSTGELFF   |
| TRAV2*01      | TRAJ21*01 | CAVVGYNFNKFYF      | V06,CASSDSTSGADTQYF |
| TRAV3*01      | TRAJ13*02 | CAGLRGGYQKVTF      | V06,CASSDSGGSYNEQFF |
| TRAV4*01      | TRAJ31*01 | CLVGASNARLMF       | V06,CASSGTSGSYNEQFF |
| TRAV41*01     | TRAJ54*01 | CAVRRVAQKLVF       | V06,CASSASGGADTQYF  |
| TRAV5*01      | TRAJ22*01 | CAERPPSGSARQLTF    | V04,CASSQERGGQETQYF |
| TRAV6*01      | TRAJ5*01  | CALDSGGGRRALTF     | V06,CASSGTSGGTDTQYF |
| TRAV8-1*01    | TRAJ13*02 | CAVILQRGYQKVTF     | V06,CASSDSGGSYNEQFF |
| TRAV8-2*01    | TRAJ24*02 | CVVSATDSWGKLQF     | V06,CASSDRDTGELFF   |
| TRAV8-3*01    | TRAJ45*01 | CAVGAAMYSGGGADGLTF | V06,CASSETSGSYNEQFF |
| TRAV8-4*01    | TRAJ26*01 | CAVSGNYGQNFVF      | V06,CASSETSGGADTQYF |
| TRAV9-2*01    | TRAJ10*01 | CALSGGGNKLTF       | V06,CASSDGTGGNEQFF  |
| TRAV9-2*01    | TRAJ8*01  | CGGFQKLVF          | V06,CASSYSTSGGNEQFF |
