# Supplementary material for: Human T cell receptor occurrence patterns encode immune history, genetic background, and receptor specificity
Source: eLife journal article supplement (doi:10.7554/elife.38358), 2018-08-28

HLA-A (1164 TCRs)

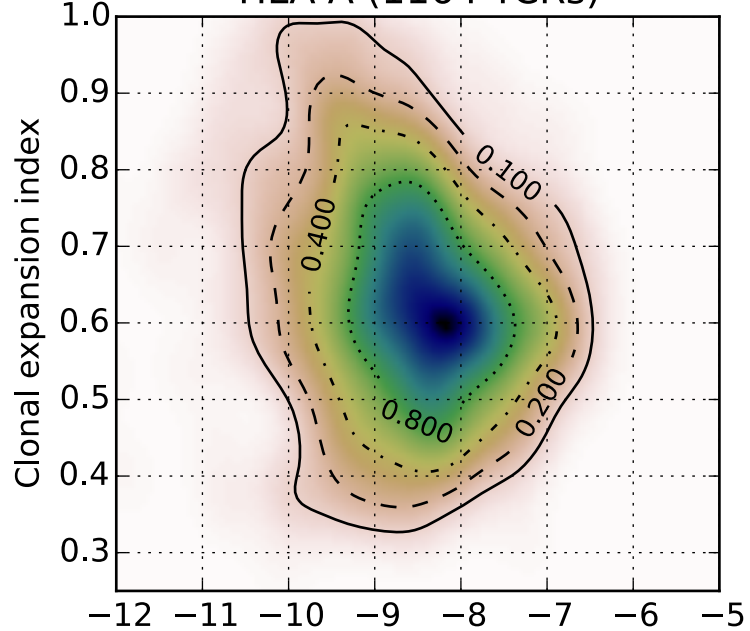

HLA-B (2217 TCRs)

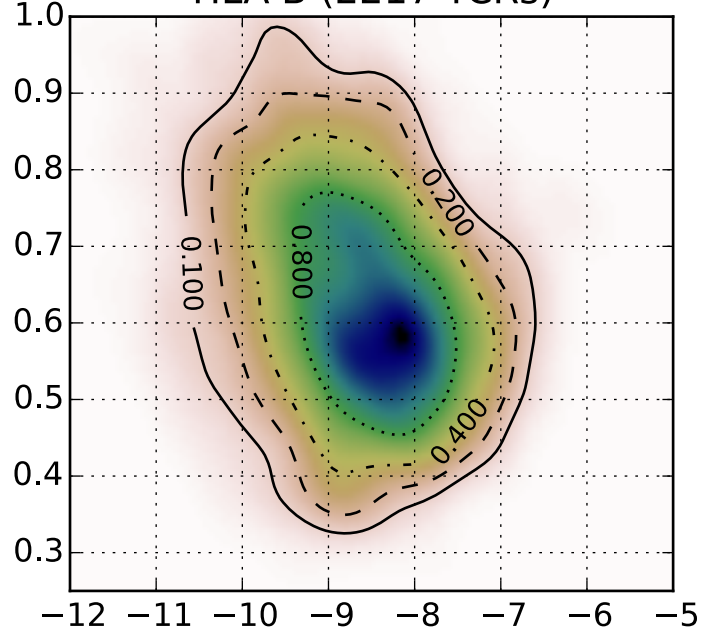

HLA-C (486 TCRs)

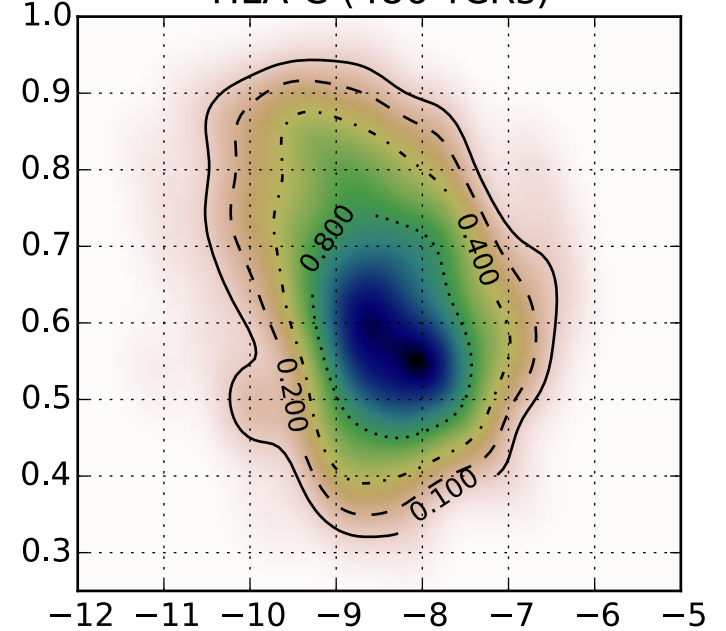

HLA-DRB1 (5717 TCRs)

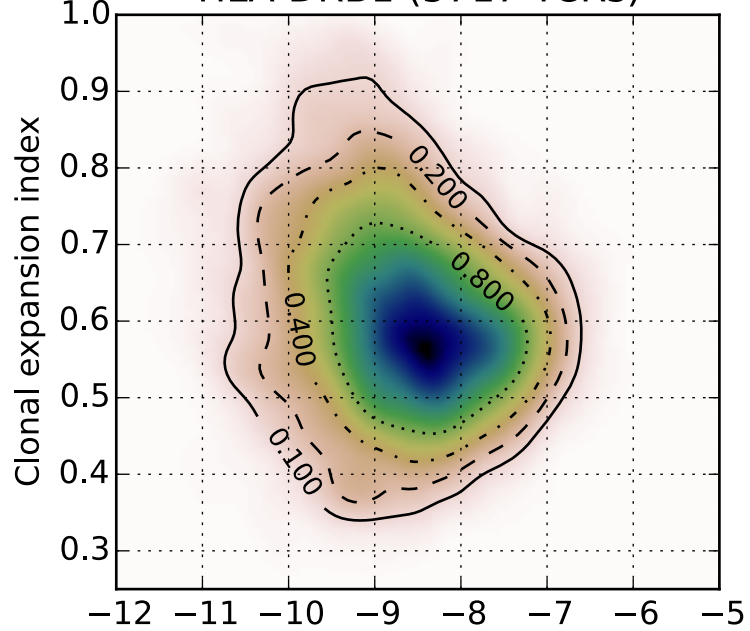

HLA-DR/DQ (4543 TCRs)

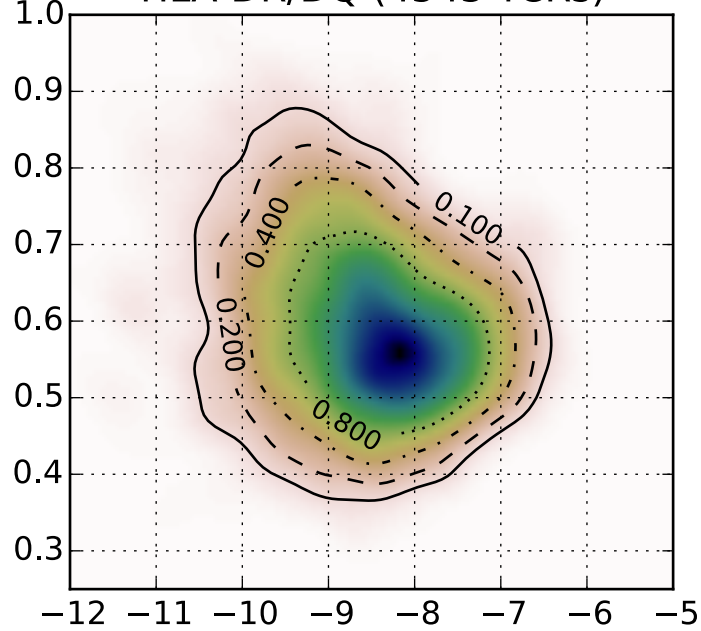

HLA-DQAB (2290 TCRs)

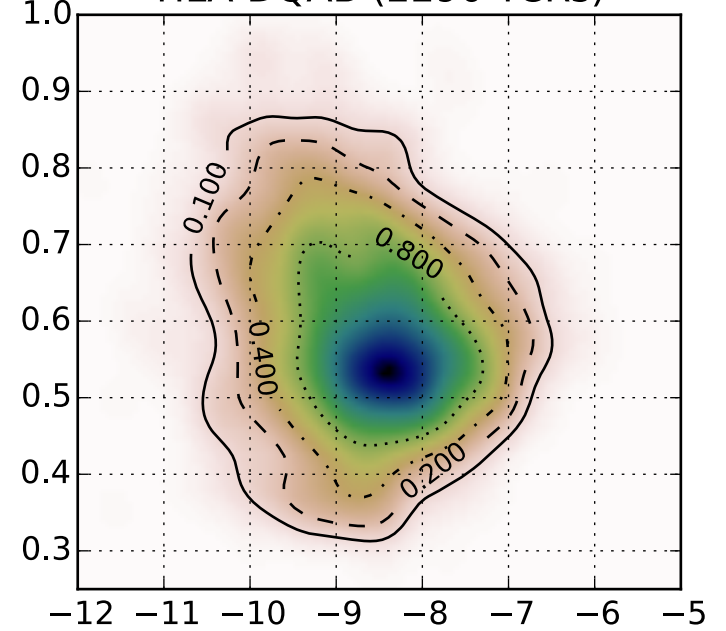

HLA-DPAB (534 TCRs)

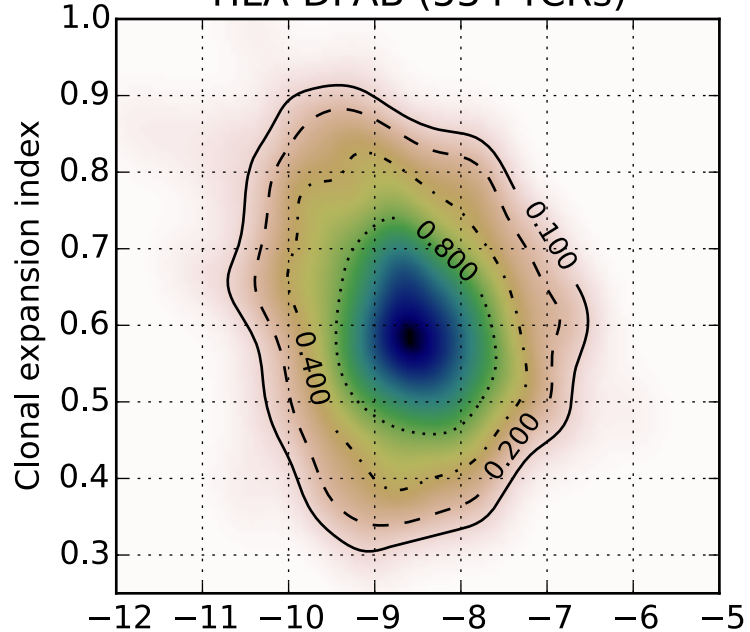

Class I (3867 TCRs)

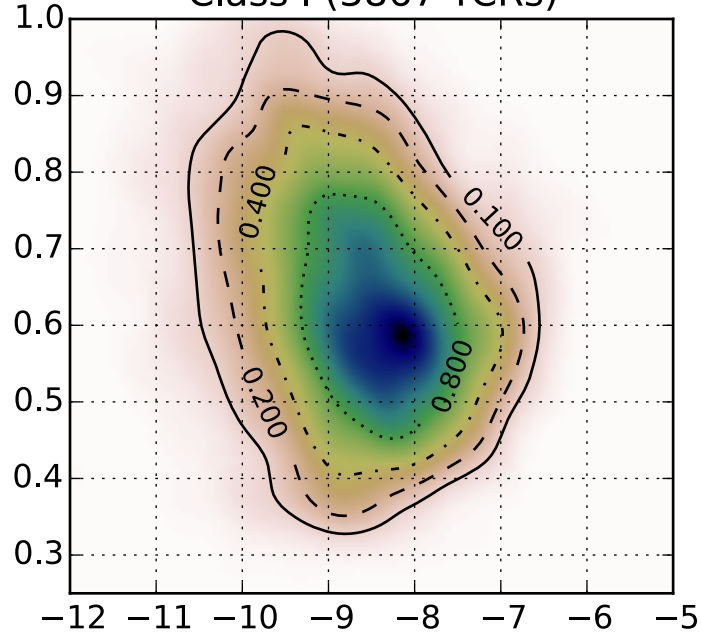

Class II (13084 TCRs)

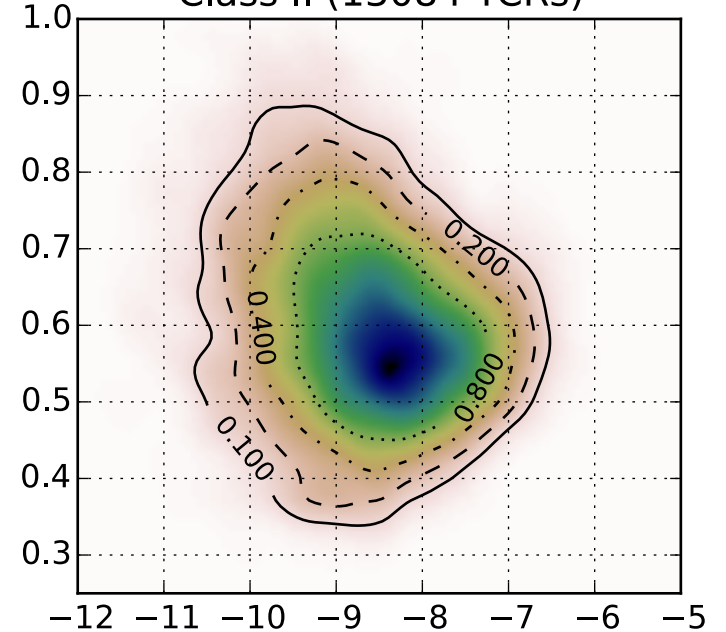

Class I+II (16951 TCRs)

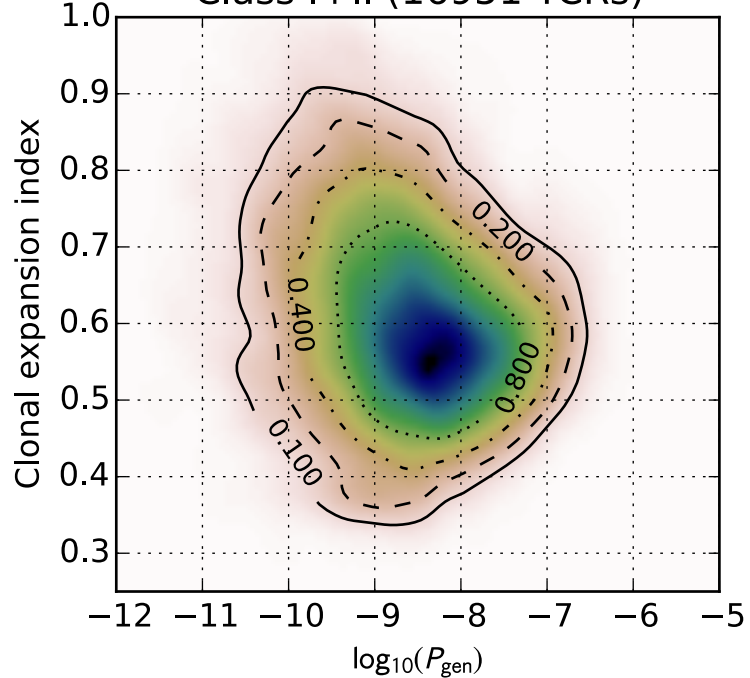

Background (16951 TCRs)

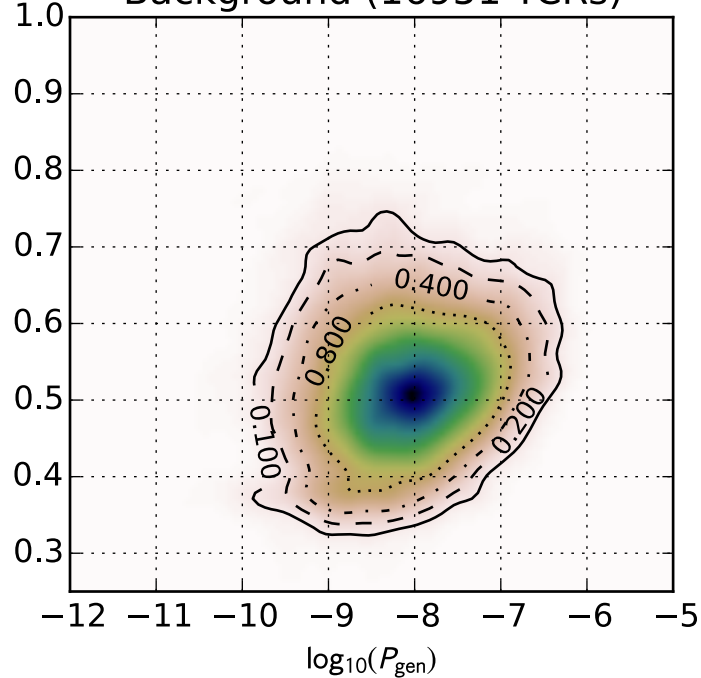

Supplement: supp [file elife_poa_e38358_Figure_4_figure_supplement_1.pdf › elife_poa_e38358_Figure_4_figure_supplement_1.pdf]
