# Supplementary material for: Human T cell receptor occurrence patterns encode immune history, genetic background, and receptor specificity
Source: eLife journal article supplement (doi:10.7554/elife.38358), 2018-08-28

Fraction class-I associated TCRs assigned to CD8

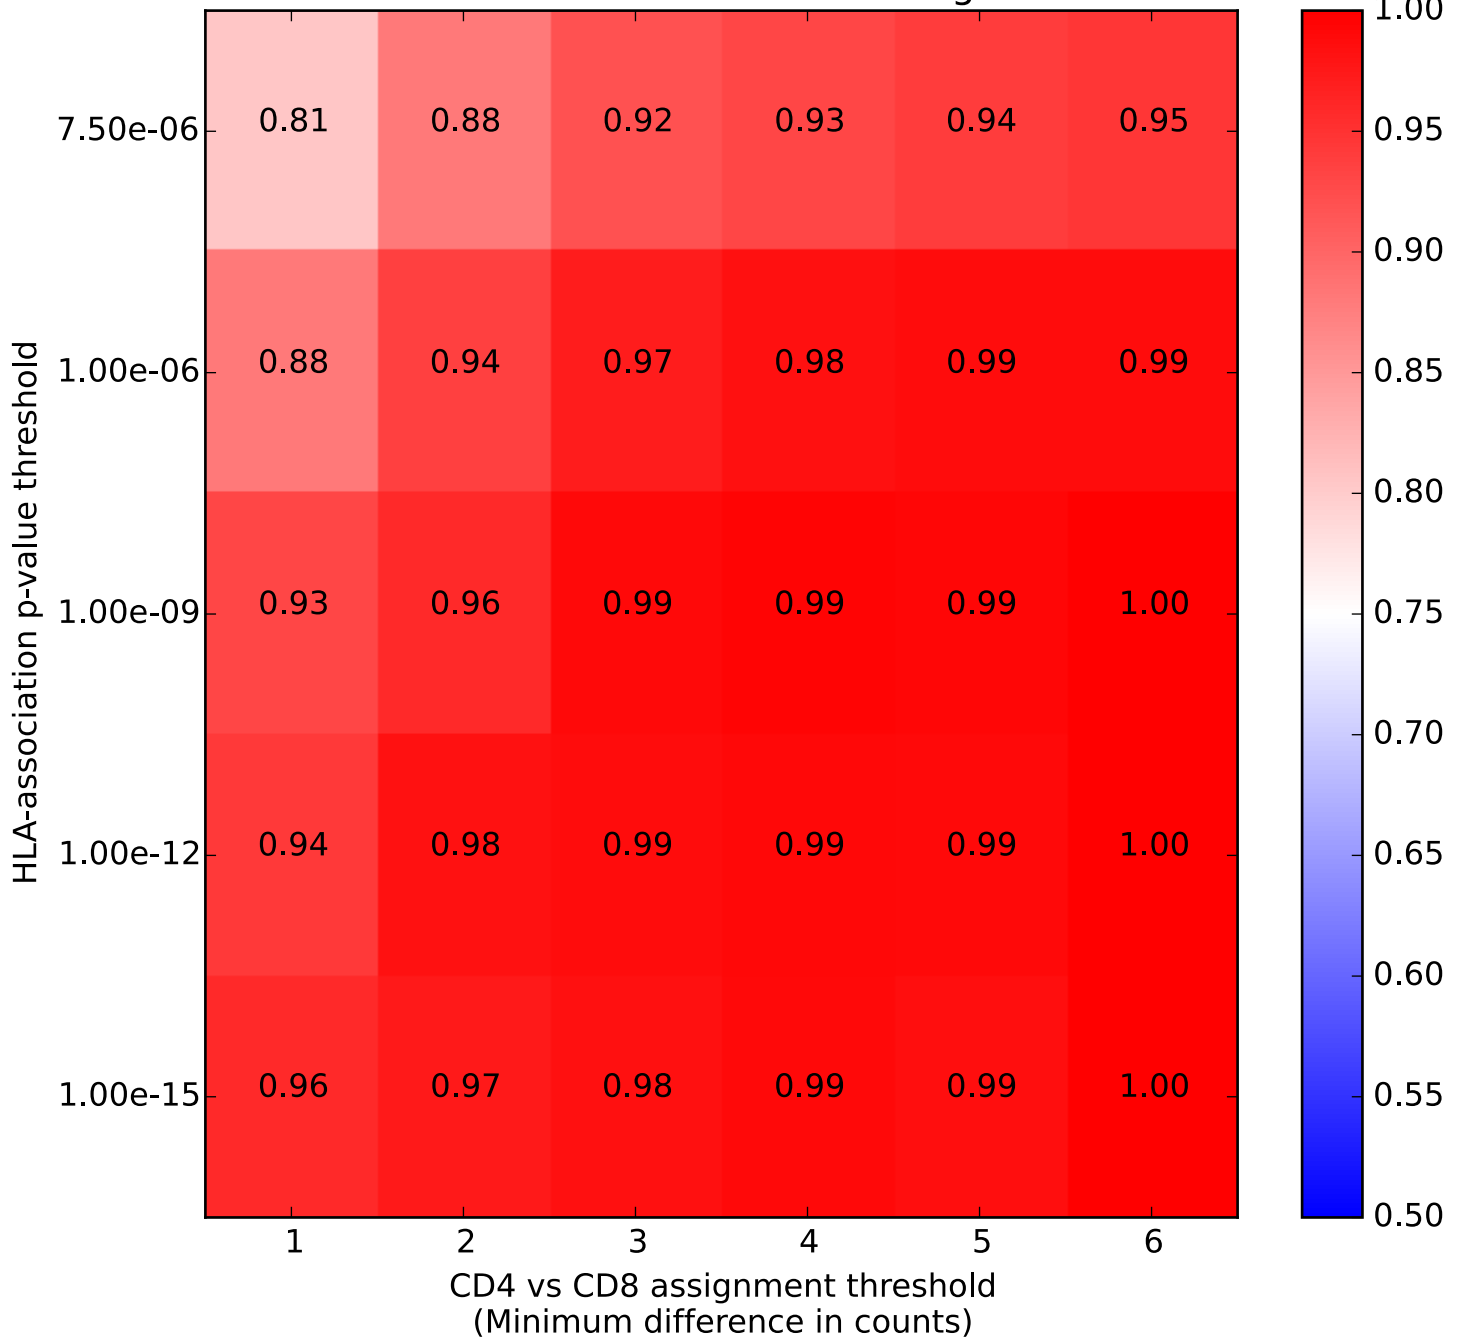

Fraction class-II associated TCRs assigned to CD4

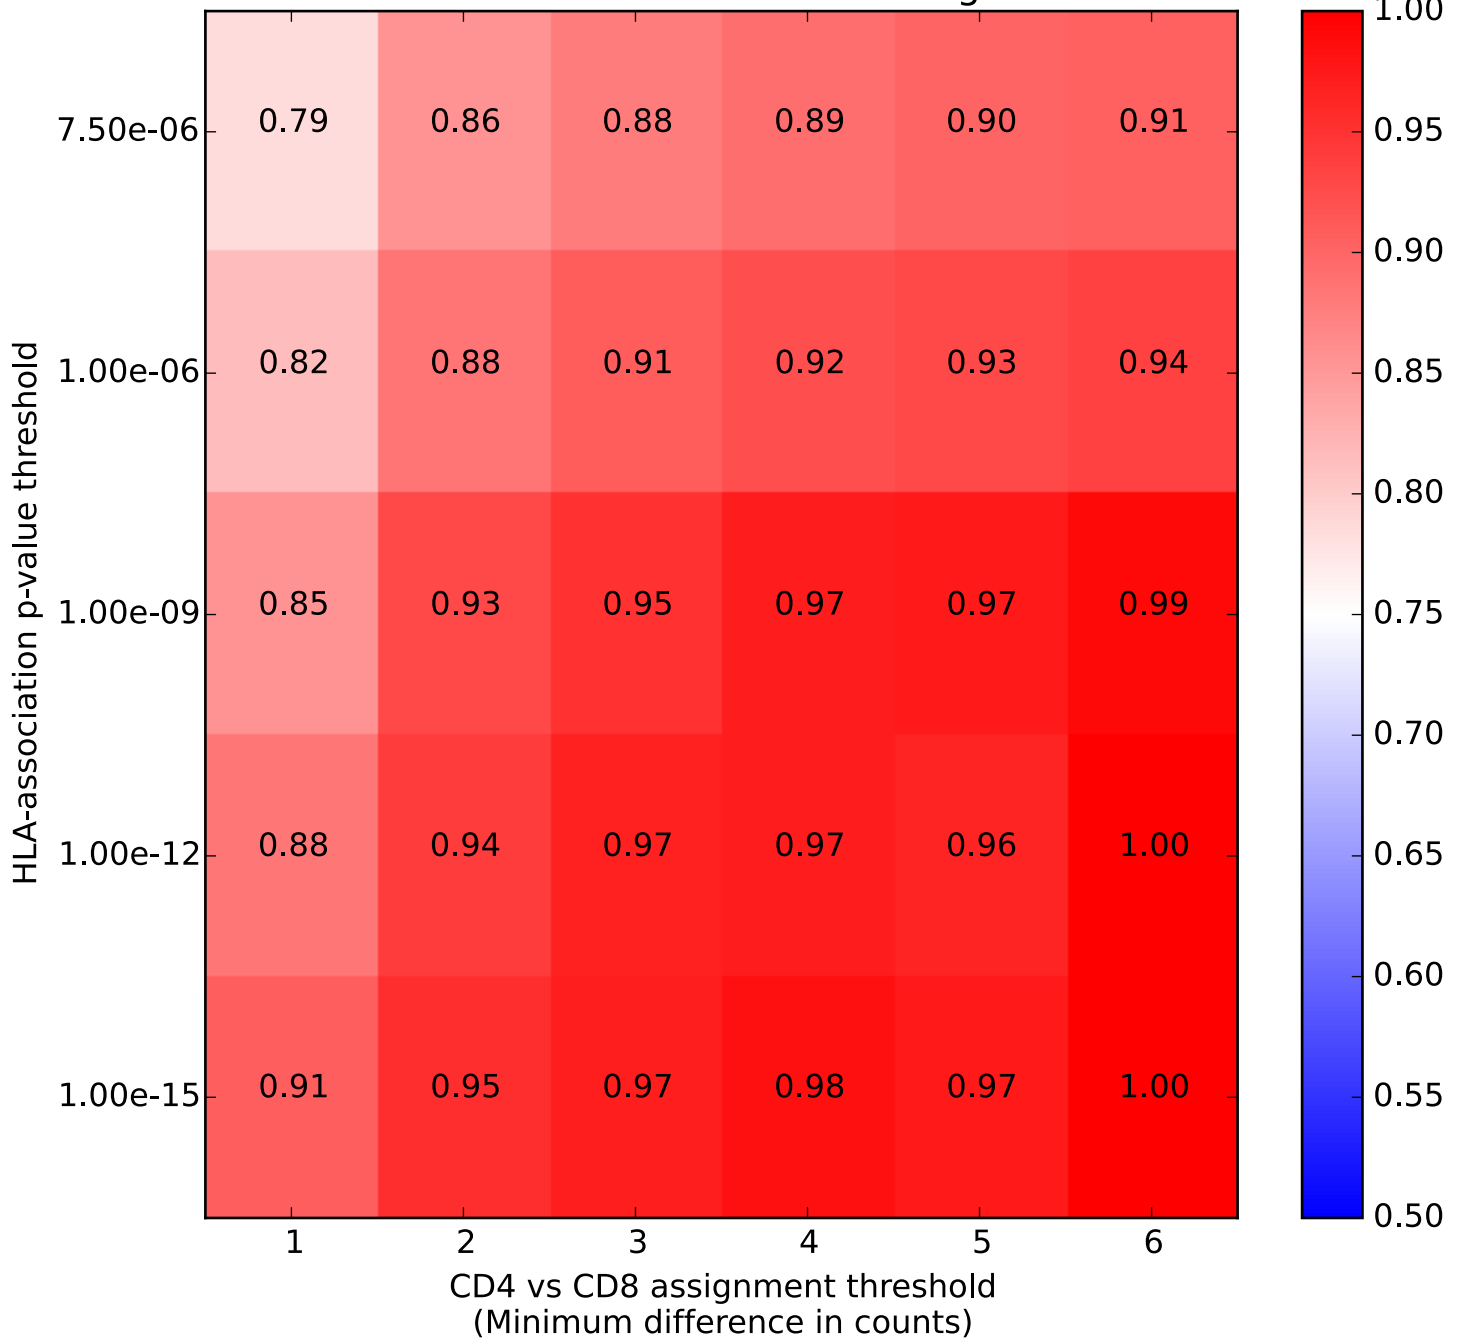

Supplement: supp [file elife_poa_e38358_Figure_5_figure_supplement_1.pdf › elife_poa_e38358_Figure_5_figure_supplement_1.pdf]
