# Supplementary figures and images for: Human T cell receptor occurrence patterns encode immune history, genetic background, and receptor specificity
Source: eLife journal article supplement (doi:10.7554/elife.38358), 2018-08-28

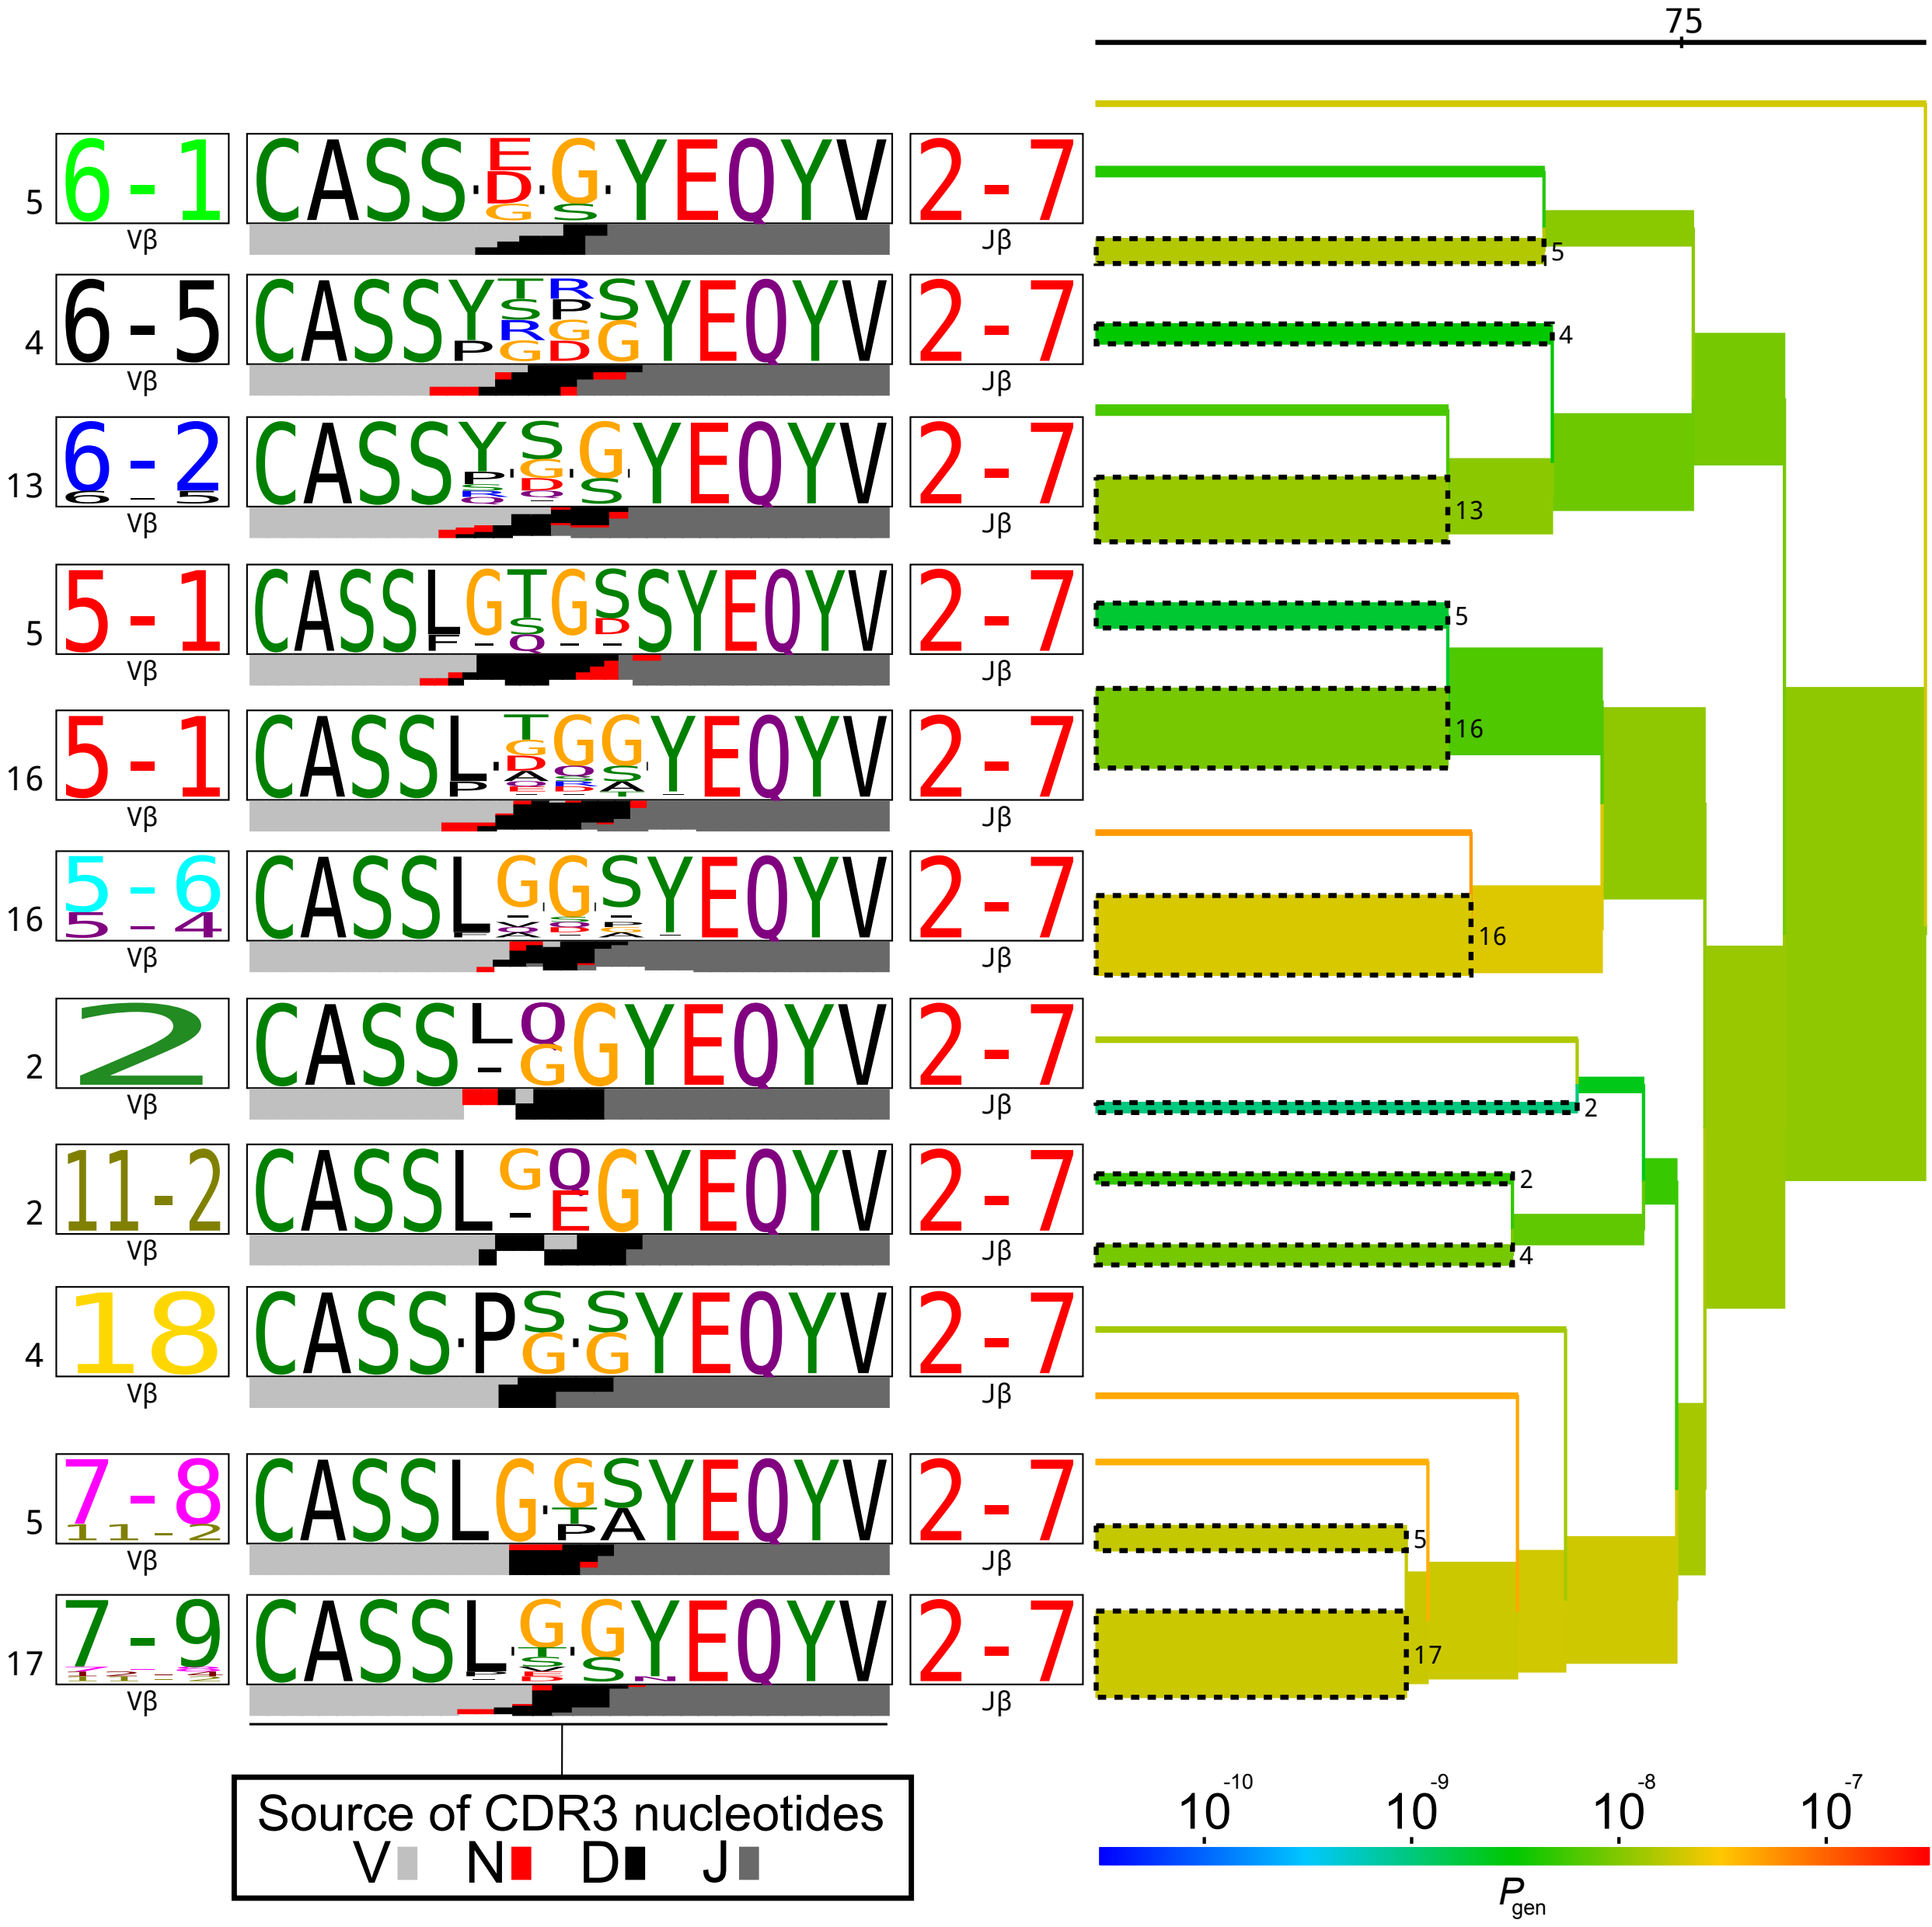

Supplement: supp [file elife_poa_e38358_Figure_3_figure_supplement_1.pdf › elife_poa_e38358_Figure_3_figure_supplement_1.pdf]

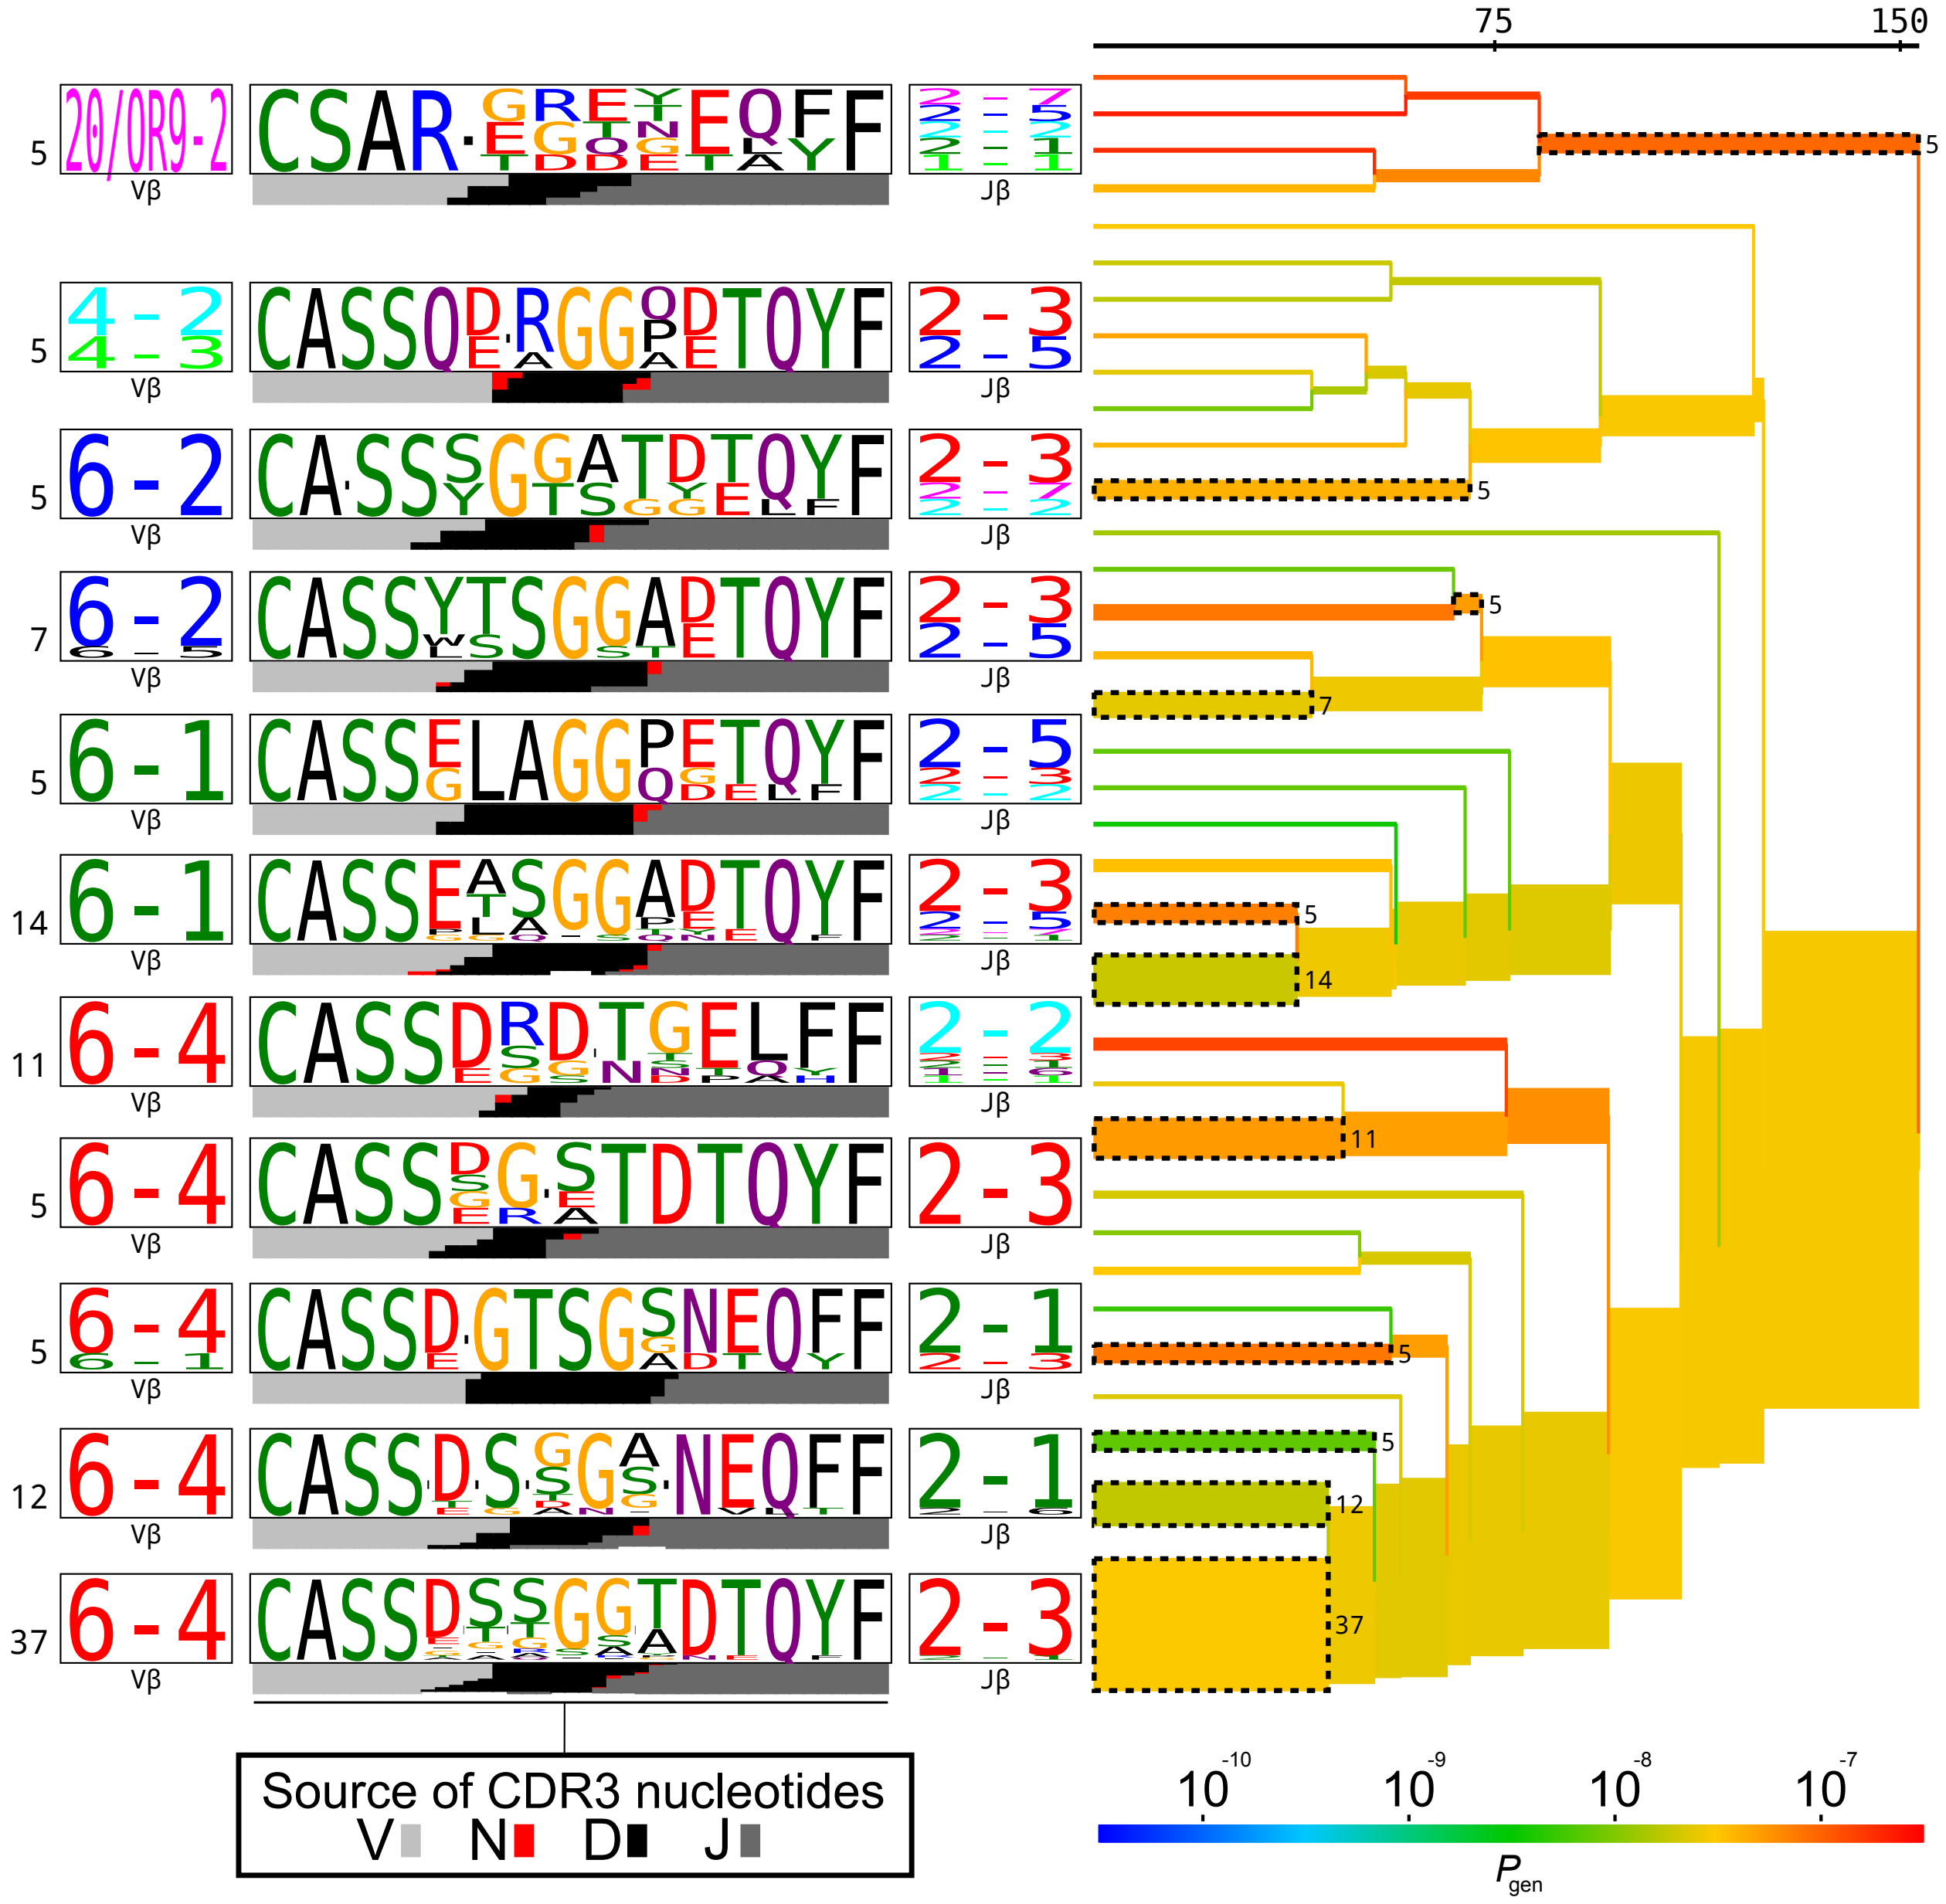

Supplement: supp [file elife_poa_e38358_Figure_3_figure_supplement_2.pdf › elife_poa_e38358_Figure_3_figure_supplement_2.pdf]

EBV  
BMLF1<sub>280</sub>  
epitope

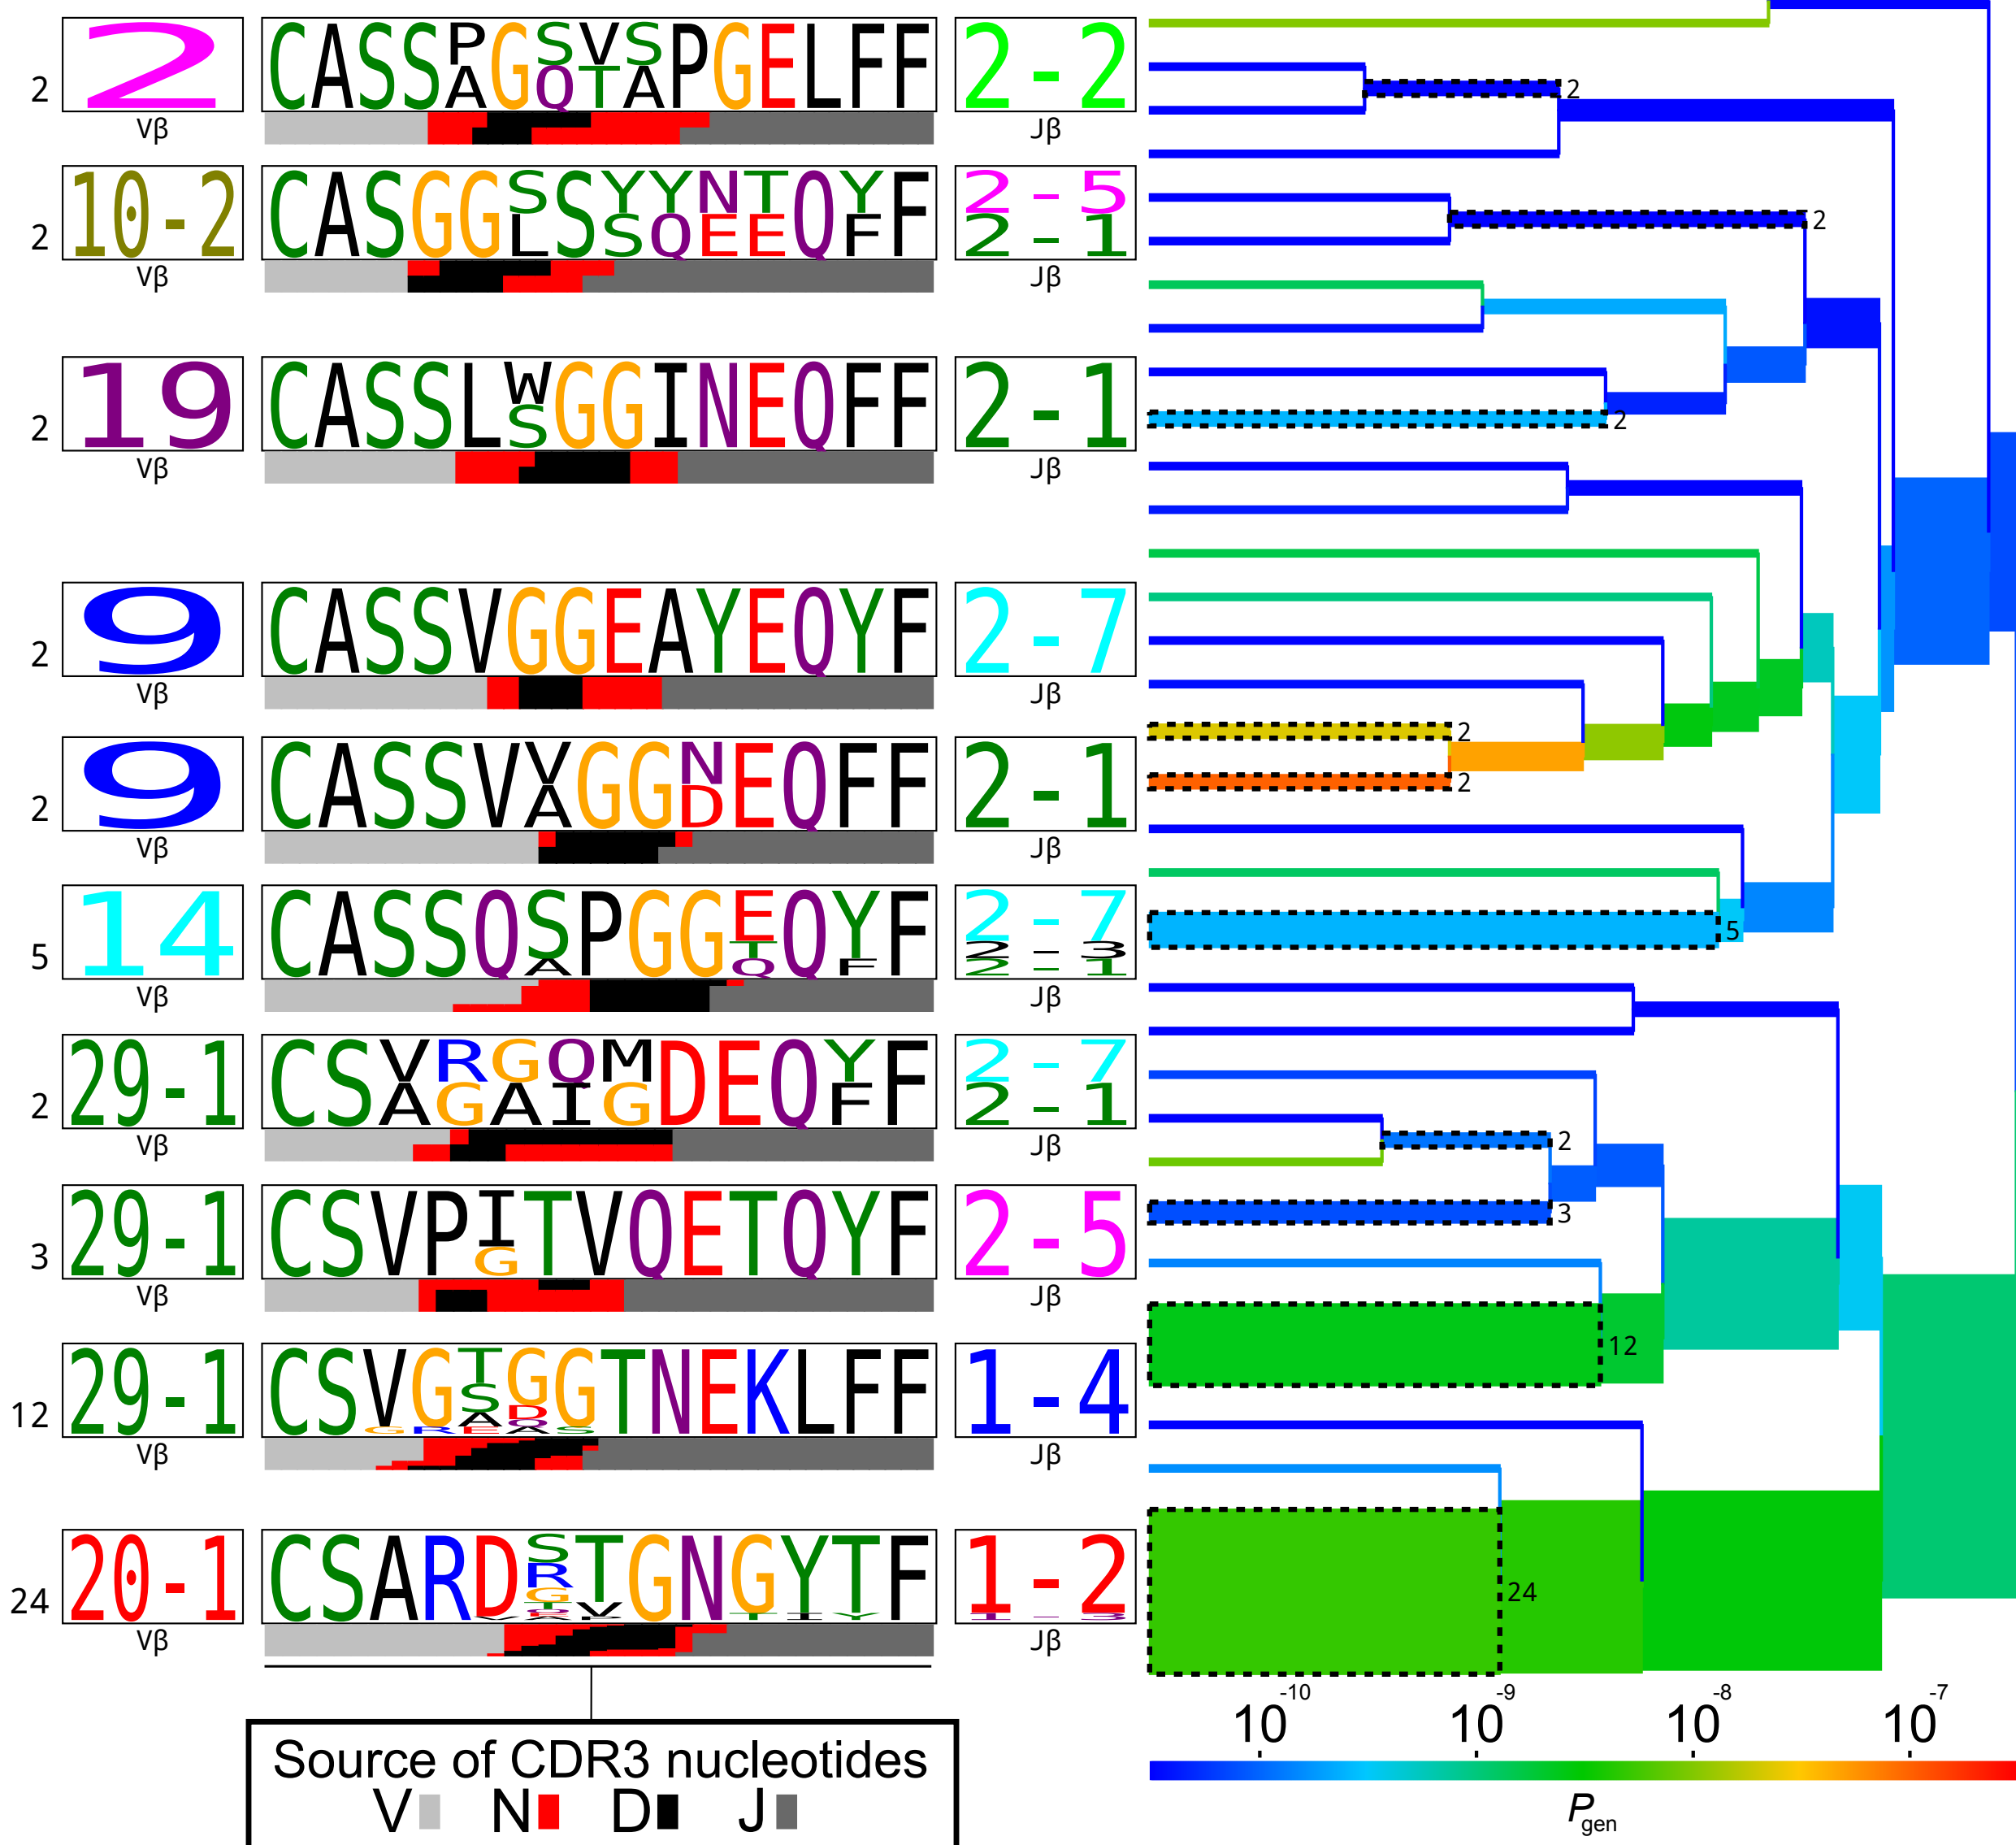

Influenza  
M1<sub>58</sub>  
epitope

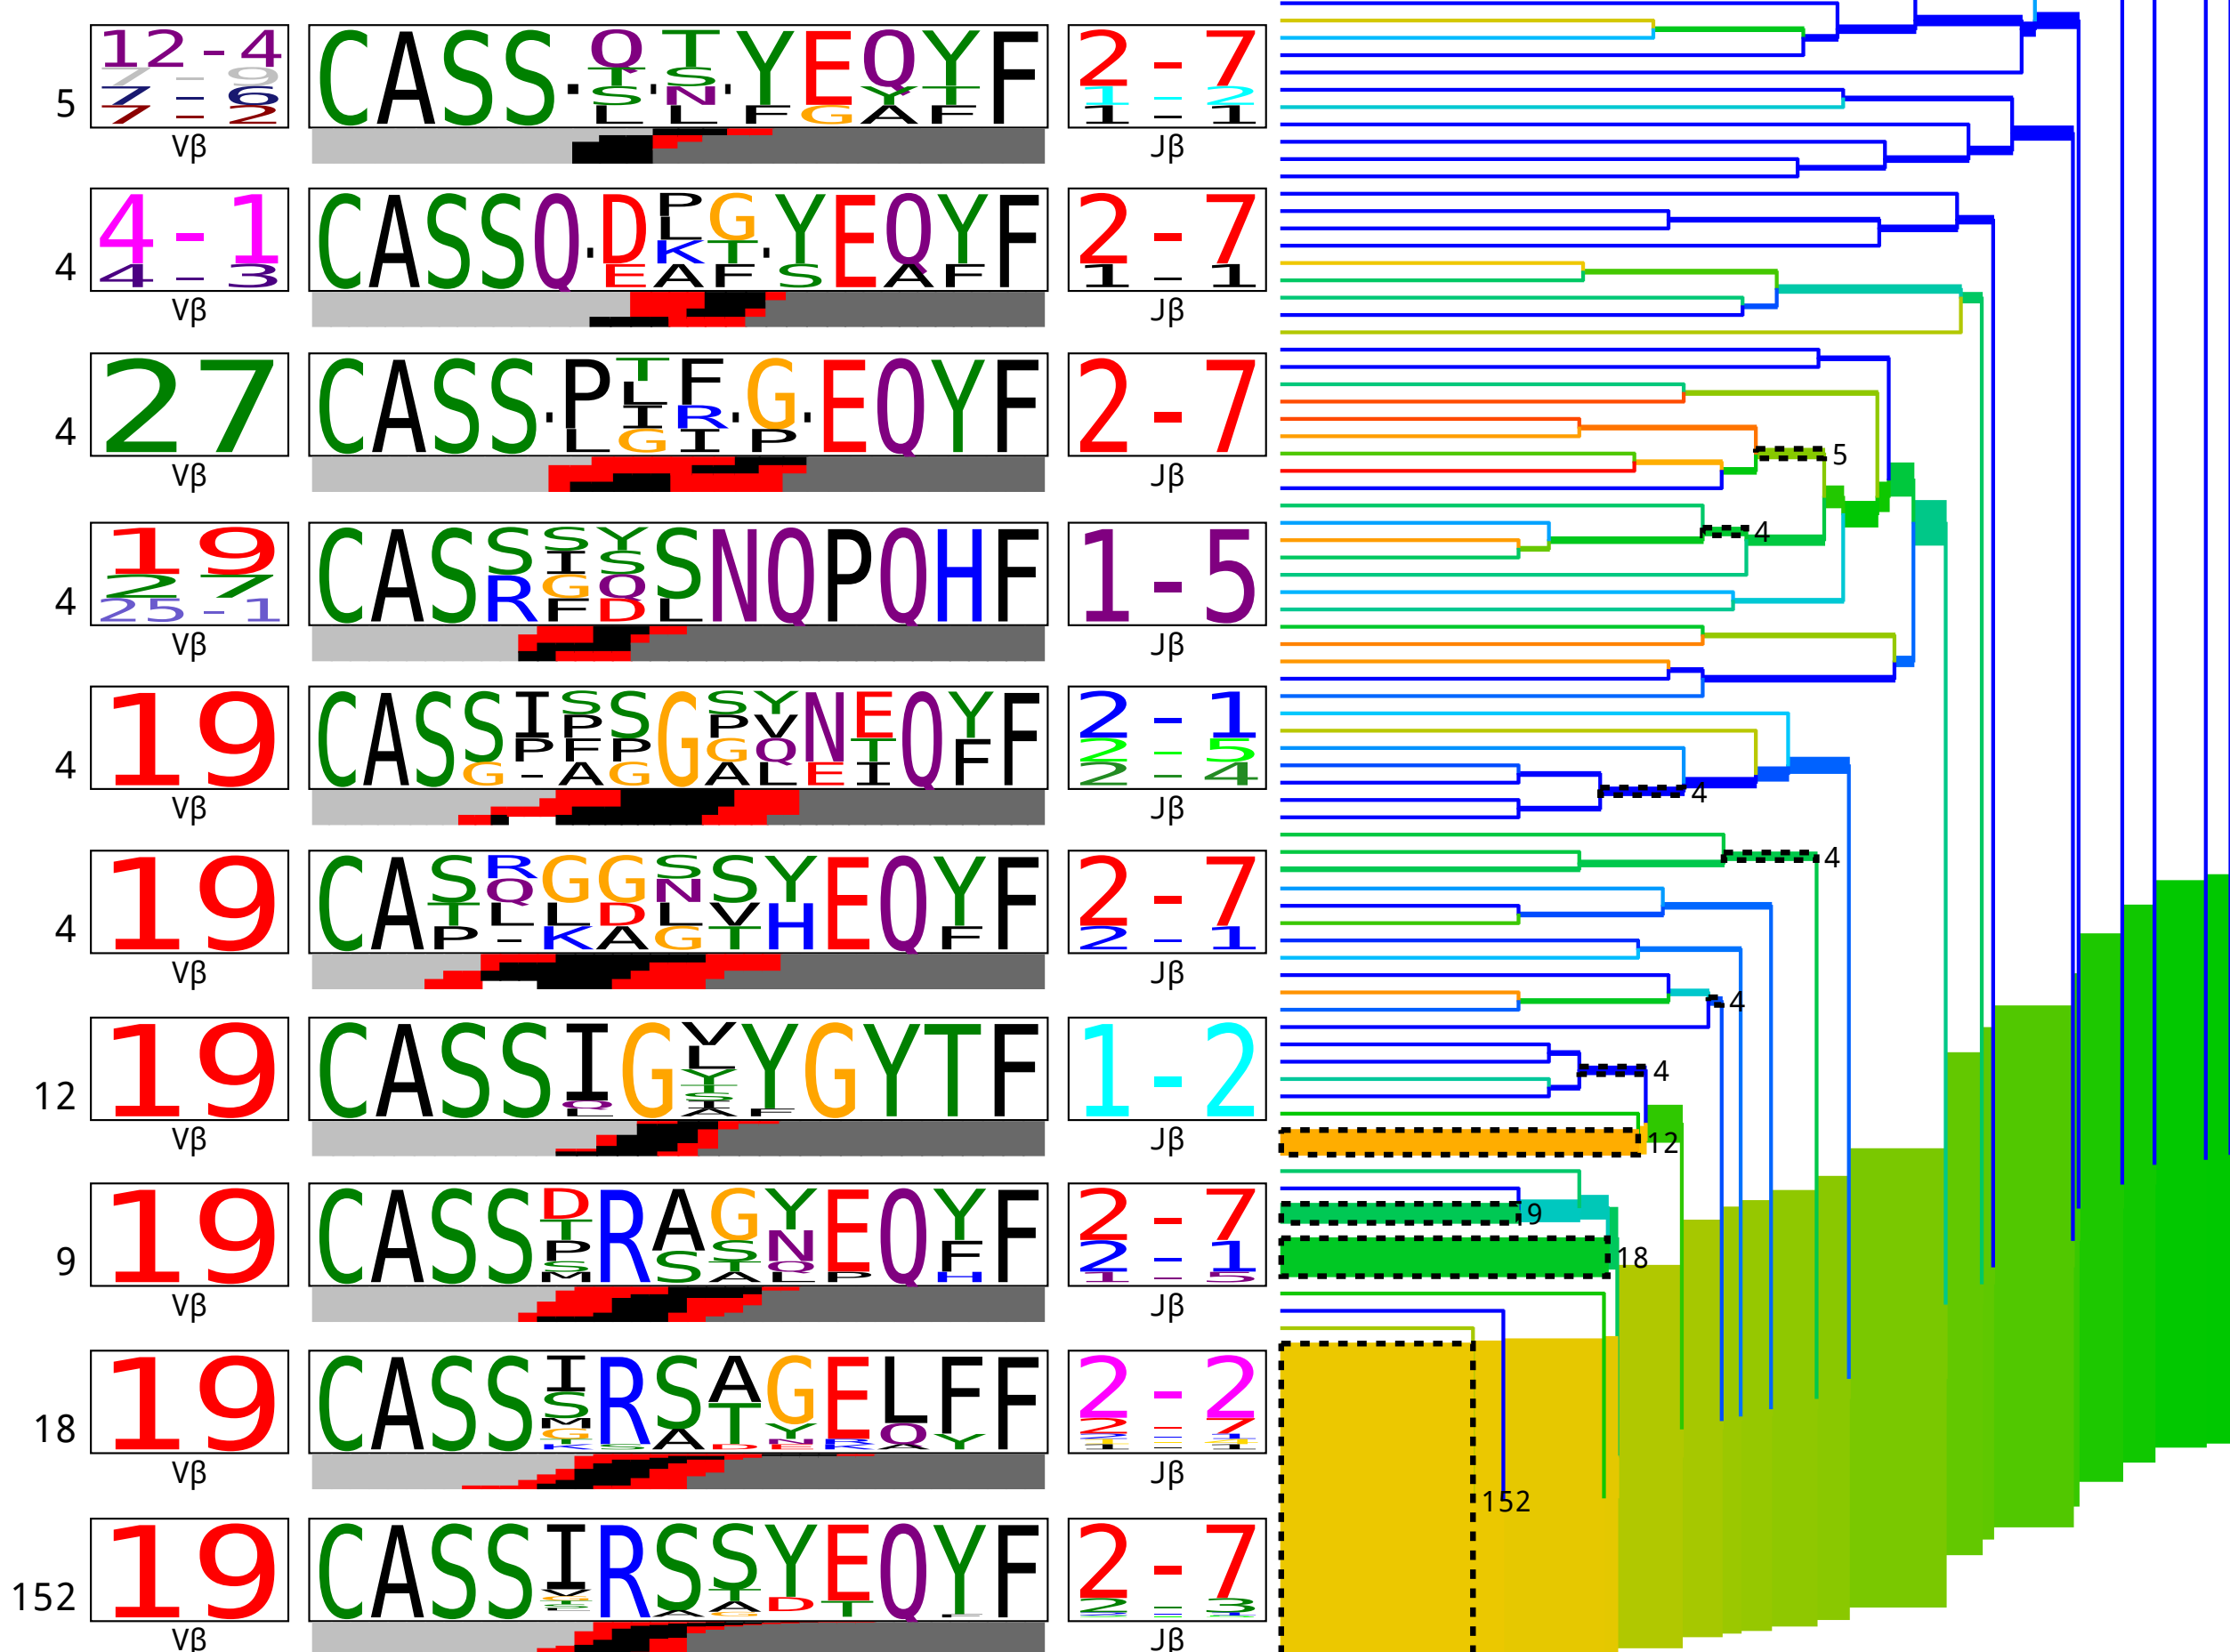

Supplement: supp [file elife_poa_e38358_Figure_4_figure_supplement_2.pdf › elife_poa_e38358_Figure_4_figure_supplement_2.pdf]

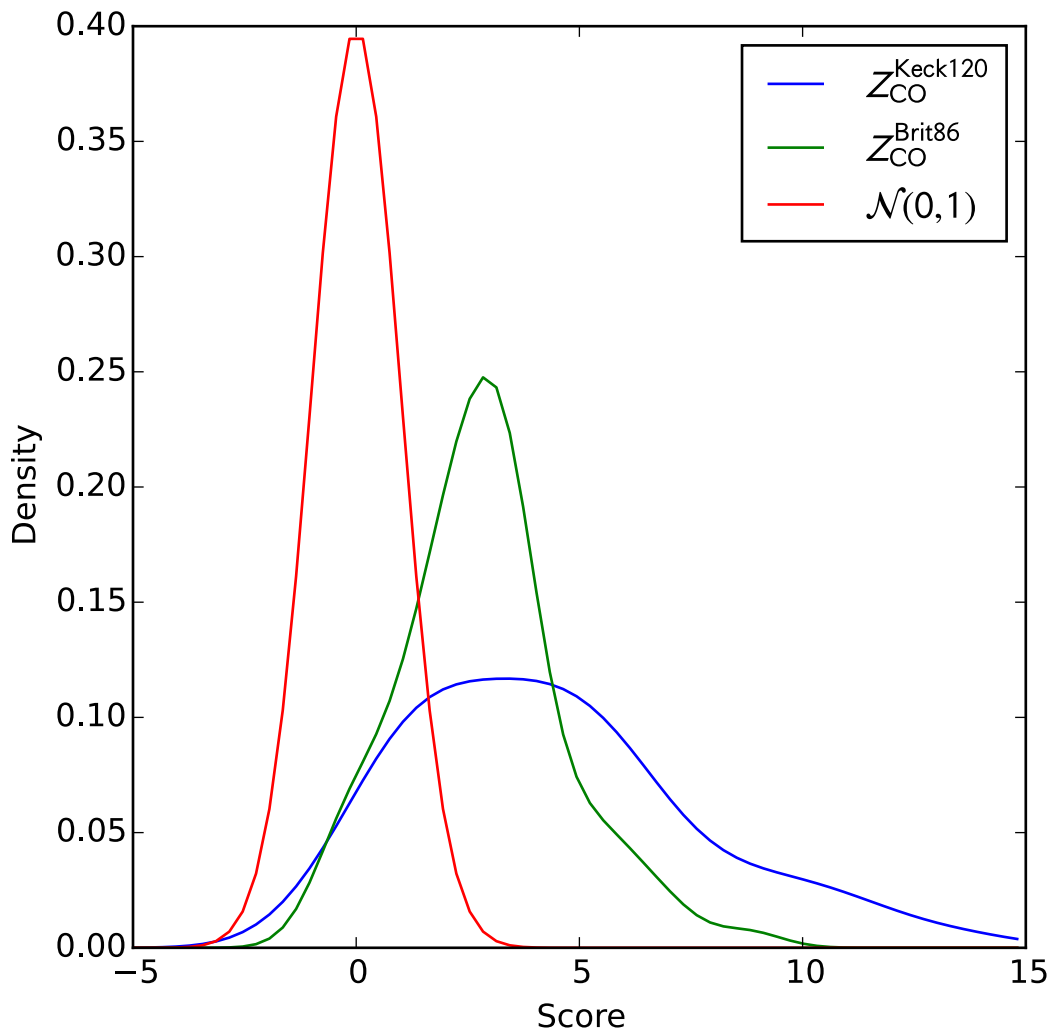

Supplement: supp [file elife_poa_e38358_Figure_6_figure_supplement_1.pdf › elife_poa_e38358_Figure_6_figure_supplement_1.pdf]
